# Supplementary material for: Nut and peanut butter intake and the risk of colorectal cancer and its anatomical and molecular subtypes: the Netherlands Cohort Study
Source: PubMed Central journal article supplement — Carcinogenesis. 2020 Jul 30;41(10):1368–84. doi: 10.1093/carcin/bgaa080 (PMC7566329; doi:10.1093/carcin/bgaa080), 2020-07-30
Supplement: bgaa080_suppl_supplementary_materials.pdf [file bgaa080_suppl_supplementary_materials.pdf]

# **Nut and peanut butter intake and the risk of colorectal cancer and its anatomical and molecular subtypes: the Netherlands Cohort Study**

Carcinogenesis

## **Supplementary Tables 1-6 and Supplementary Figures 1-2**

Lisette Nieuwenhuis<sup>1,\*</sup>, Colinda C.J.M. Simons<sup>2</sup>, Matty P. Weijnen<sup>2</sup>, and Piet A. van den Brandt<sup>1,2</sup>

<sup>1</sup> Maastricht University Medical Center+, Care and Public Health Research Institute (CAPHRI), Department of Epidemiology, Maastricht, the Netherlands

<sup>2</sup> Maastricht University Medical Center+, GROW – School for Oncology and Developmental Biology, Department of Epidemiology, Maastricht, the Netherlands

\* To whom correspondence should be addressed. Tel: +31 4338 82902; Fax: +31 4338 84128; Email: [l.nieuwenhuis@maastrichtuniversity.nl](mailto:l.nieuwenhuis@maastrichtuniversity.nl)

**Supplementary Table 1.** Age-adjusted HRs and 95%CI for colorectal cancer and anatomical subtypes in men, according to nut and peanut butter consumption; NLCS, 1986-2006

|                                   | Colorectal cancer          |              |       |                         | Colon cancer |                         | Proximal colon cancer |                         | Distal colon cancer |                         | Rectal cancer |                         |
|-----------------------------------|----------------------------|--------------|-------|-------------------------|--------------|-------------------------|-----------------------|-------------------------|---------------------|-------------------------|---------------|-------------------------|
|                                   | Median intake <sup>a</sup> | Person-years | Cases | Age-adjusted HR (95%CI) | Cases        | Age-adjusted HR (95%CI) | Cases                 | Age-adjusted HR (95%CI) | Cases               | Age-adjusted HR (95%CI) | Cases         | Age-adjusted HR (95%CI) |
| <b>Total nut intake (g/day)</b>   |                            |              |       |                         |              |                         |                       |                         |                     |                         |               |                         |
| 0                                 | 0.0                        | 8605         | 614   | 1.00 (reference)        | 397          | 1.00 (reference)        | 173                   | 1.00 (reference)        | 218                 | 1.00 (reference)        | 155           | 1.00 (reference)        |
| 0.1-<5                            | 2.5                        | 9509         | 668   | 0.99 (0.84-1.17)        | 426          | 0.98 (0.81-1.18)        | 196                   | 1.04 (0.81-1.32)        | 213                 | 0.89 (0.71-1.11)        | 168           | 0.98 (0.76-1.26)        |
| 5-<10                             | 8.5                        | 3896         | 252   | 0.92 (0.74-1.15)        | 170          | 0.96 (0.75-1.23)        | 78                    | 1.02 (0.74-1.41)        | 82                  | 0.84 (0.62-1.13)        | 48            | 0.69 (0.48-0.99)        |
| 10+                               | 21.4                       | 6936         | 459   | 0.96 (0.80-1.16)        | 303          | 0.99 (0.81-1.21)        | 142                   | 1.08 (0.83-1.41)        | 155                 | 0.91 (0.71-1.17)        | 104           | 0.85 (0.64-1.12)        |
| P-trend                           |                            |              |       | 0.652                   |              | 0.988                   |                       | 0.590                   |                     | 0.652                   |               | 0.171                   |
| Continuous, per 5 g/day increment |                            |              |       | 1.00 (0.97-1.02)        |              | 0.99 (0.97-1.02)        |                       | 1.00 (0.97-1.04)        |                     | 0.99 (0.95-1.02)        |               | 1.00 (0.96-1.04)        |
| <b>Tree nuts (g/day)</b>          |                            |              |       |                         |              |                         |                       |                         |                     |                         |               |                         |
| 0                                 | 0.0                        | 20837        | 1453  | 1.00 (reference)        | 935          | 1.00 (reference)        | 421                   | 1.00 (reference)        | 488                 | 1.00 (reference)        | 346           | 1.00 (reference)        |
| 0.1-<5                            | 1.6                        | 6615         | 439   | 0.95 (0.81-1.12)        | 289          | 0.97 (0.81-1.16)        | 130                   | 0.97 (0.77-1.23)        | 147                 | 0.95 (0.76-1.18)        | 109           | 0.99 (0.77-1.26)        |
| 5+                                | 8.9                        | 1494         | 101   | 0.97 (0.71-1.31)        | 72           | 1.07 (0.77-1.49)        | 38                    | 1.25 (0.84-1.87)        | 33                  | 0.94 (0.61-1.43)        | 20            | 0.80 (0.49-1.33)        |
| P-trend                           |                            |              |       | 0.729                   |              | 0.754                   |                       | 0.317                   |                     | 0.699                   |               | 0.406                   |
| Continuous, per 5 g/day increment |                            |              |       | 0.98 (0.89-1.07)        |              | 1.00 (0.91-1.10)        |                       | 1.03 (0.93-1.15)        |                     | 0.96 (0.85-1.09)        |               | 0.96 (0.82-1.12)        |
| <b>Peanuts (g/day)</b>            |                            |              |       |                         |              |                         |                       |                         |                     |                         |               |                         |
| 0                                 | 0.0                        | 9711         | 696   | 1.00 (reference)        | 448          | 1.00 (reference)        | 198                   | 1.00 (reference)        | 241                 | 1.00 (reference)        | 177           | 1.00 (reference)        |
| 0.1-<5                            | 2.5                        | 10376        | 718   | 0.99 (0.84-1.16)        | 462          | 0.99 (0.83-1.19)        | 216                   | 1.07 (0.85-1.34)        | 226                 | 0.89 (0.72-1.11)        | 178           | 0.95 (0.75-1.21)        |
| 5-<10                             | 8.5                        | 3216         | 197   | 0.90 (0.71-1.13)        | 133          | 0.95 (0.73-1.23)        | 58                    | 0.96 (0.68-1.35)        | 70                  | 0.91 (0.67-1.25)        | 35            | 0.61 (0.41-0.91)        |
| 10+                               | 21.4                       | 5643         | 382   | 1.00 (0.82-1.21)        | 253          | 1.04 (0.84-1.28)        | 117                   | 1.11 (0.84-1.46)        | 131                 | 0.98 (0.76-1.27)        | 85            | 0.85 (0.63-1.14)        |
| P-trend                           |                            |              |       | 0.933                   |              | 0.727                   |                       | 0.563                   |                     | 0.883                   |               | 0.190                   |
| Continuous, per 5 g/day increment |                            |              |       | 1.00 (0.97-1.02)        |              | 0.99 (0.97-1.02)        |                       | 1.00 (0.97-1.04)        |                     | 0.99 (0.95-1.02)        |               | 1.00 (0.96-1.04)        |
| <b>Peanut butter (g/day)</b>      |                            |              |       |                         |              |                         |                       |                         |                     |                         |               |                         |
| 0                                 | 0.0                        | 20730        | 1427  | 1.00 (reference)        | 929          | 1.00 (reference)        | 425                   | 1.00 (reference)        | 476                 | 1.00 (reference)        | 347           | 1.00 (reference)        |
| 0.1-<5                            | 1.2                        | 4995         | 318   | 0.96 (0.81-1.16)        | 208          | 0.98 (0.80-1.20)        | 94                    | 0.98 (0.76-1.28)        | 106                 | 0.96 (0.75-1.23)        | 70            | 0.85 (0.64-1.14)        |
| 5+                                | 9.6                        | 3220         | 248   | 1.16 (0.94-1.44)        | 159          | 1.16 (0.91-1.46)        | 70                    | 1.13 (0.83-1.53)        | 86                  | 1.21 (0.91-1.60)        | 58            | 1.10 (0.80-1.51)        |
| P-trend                           |                            |              |       | 0.150                   |              | 0.223                   |                       | 0.429                   |                     | 0.188                   |               | 0.558                   |
| Continuous, per 5 g/day increment |                            |              |       | 1.03 (0.96-1.11)        |              | 1.03 (0.95-1.11)        |                       | 1.04 (0.95-1.15)        |                     | 1.02 (0.93-1.12)        |               | 0.99 (0.88-1.10)        |

<sup>a</sup> Median intake in the subcohort

**Supplementary Table 2.** Age-adjusted HRs and 95%CI for colorectal cancer and anatomical subtypes in women, according to nut and peanut butter consumption; NLCS, 1986-2006

|                                   | Colorectal cancer          |              |       |                         | Colon cancer |                         | Proximal colon cancer |                         | Distal colon cancer |                         | Rectal cancer |                         |
|-----------------------------------|----------------------------|--------------|-------|-------------------------|--------------|-------------------------|-----------------------|-------------------------|---------------------|-------------------------|---------------|-------------------------|
|                                   | Median intake <sup>a</sup> | Person-years | Cases | Age-adjusted HR (95%CI) | Cases        | Age-adjusted HR (95%CI) | Cases                 | Age-adjusted HR (95%CI) | Cases               | Age-adjusted HR (95%CI) | Cases         | Age-adjusted HR (95%CI) |
| <b>Total nut intake (g/day)</b>   |                            |              |       |                         |              |                         |                       |                         |                     |                         |               |                         |
| 0                                 | 0.0                        | 13183        | 629   | 1.00 (reference)        | 452          | 1.00 (reference)        | 276                   | 1.00 (reference)        | 163                 | 1.00 (reference)        | 126           | 1.00 (reference)        |
| 0.1-<5                            | 2.1                        | 12150        | 606   | 1.09 (0.93-1.28)        | 462          | 1.16 (0.98-1.38)        | 261                   | 1.09 (0.89-1.33)        | 189                 | 1.29 (1.02-1.64)        | 106           | 0.94 (0.71-1.25)        |
| 5-<10                             | 7.8                        | 3762         | 149   | 0.91 (0.72-1.16)        | 125          | 1.08 (0.83-1.39)        | 71                    | 1.03 (0.75-1.40)        | 49                  | 1.12 (0.78-1.61)        | 14            | 0.42 (0.23-0.75)        |
| 10+                               | 15.7                       | 4223         | 190   | 1.00 (0.80-1.25)        | 148          | 1.09 (0.85-1.39)        | 95                    | 1.16 (0.88-1.55)        | 51                  | 1.01 (0.71-1.44)        | 31            | 0.80 (0.52-1.22)        |
| P-trend                           |                            |              |       | 0.628                   |              | 0.703                   |                       | 0.392                   |                     | 0.762                   |               | 0.087                   |
| Continuous, per 5 g/day increment |                            |              |       | 1.00 (0.96-1.04)        |              | 1.02 (0.97-1.06)        |                       | 1.02 (0.97-1.07)        |                     | 1.01 (0.95-1.08)        |               | 0.94 (0.84-1.04)        |
| <b>Tree nuts (g/day)</b>          |                            |              |       |                         |              |                         |                       |                         |                     |                         |               |                         |
| 0                                 | 0.0                        | 23269        | 1124  | 1.00 (reference)        | 835          | 1.00 (reference)        | 507                   | 1.00 (reference)        | 306                 | 1.00 (reference)        | 207           | 1.00 (reference)        |
| 0.1-<5                            | 1.6                        | 8228         | 368   | 0.95 (0.81-1.11)        | 289          | 1.00 (0.84-1.19)        | 159                   | 0.91 (0.74-1.13)        | 122                 | 1.14 (0.90-1.45)        | 55            | 0.77 (0.56-1.05)        |
| 5+                                | 8.9                        | 1821         | 82    | 0.97 (0.71-1.32)        | 63           | 1.00 (0.72-1.40)        | 37                    | 0.98 (0.66-1.45)        | 24                  | 1.03 (0.64-1.63)        | 15            | 0.96 (0.54-1.69)        |
| P-trend                           |                            |              |       | 0.743                   |              | 0.984                   |                       | 0.786                   |                     | 0.740                   |               | 0.647                   |
| Continuous, per 5 g/day increment |                            |              |       | 0.97 (0.88-1.06)        |              | 0.98 (0.90-1.07)        |                       | 1.00 (0.90-1.10)        |                     | 0.96 (0.84-1.09)        |               | 0.92 (0.70-1.21)        |
| <b>Peanuts (g/day)</b>            |                            |              |       |                         |              |                         |                       |                         |                     |                         |               |                         |
| 0                                 | 0.0                        | 15536        | 733   | 1.00 (reference)        | 531          | 1.00 (reference)        | 316                   | 1.00 (reference)        | 201                 | 1.00 (reference)        | 143           | 1.00 (reference)        |
| 0.1-<5                            | 2.5                        | 12435        | 608   | 1.10 (0.94-1.28)        | 473          | 1.18 (1.00-1.39)        | 278                   | 1.18 (0.97-1.44)        | 182                 | 1.17 (0.93-1.47)        | 101           | 0.92 (0.69-1.22)        |
| 5-<10                             | 8.5                        | 2442         | 96    | 0.92 (0.69-1.22)        | 76           | 1.01 (0.74-1.37)        | 39                    | 0.90 (0.61-1.31)        | 33                  | 1.11 (0.73-1.68)        | 12            | 0.57 (0.31-1.07)        |
| 10+                               | 17.1                       | 2905         | 137   | 1.06 (0.83-1.37)        | 107          | 1.15 (0.88-1.52)        | 70                    | 1.29 (0.94-1.78)        | 36                  | 0.99 (0.67-1.48)        | 21            | 0.82 (0.50-1.35)        |
| P-trend                           |                            |              |       | 0.910                   |              | 0.490                   |                       | 0.281                   |                     | 0.955                   |               | 0.235                   |
| Continuous, per 5 g/day increment |                            |              |       | 1.01 (0.96-1.06)        |              | 1.03 (0.98-1.08)        |                       | 1.03 (0.97-1.09)        |                     | 1.03 (0.95-1.10)        |               | 0.93 (0.82-1.05)        |
| <b>Peanut butter (g/day)</b>      |                            |              |       |                         |              |                         |                       |                         |                     |                         |               |                         |
| 0                                 | 0.0                        | 24266        | 1170  | 1.00 (reference)        | 866          | 1.00 (reference)        | 520                   | 1.00 (reference)        | 323                 | 1.00 (reference)        | 214           | 1.00 (reference)        |
| 0.1-<5                            | 1.2                        | 5866         | 269   | 0.99 (0.82-1.18)        | 208          | 1.03 (0.85-1.26)        | 119                   | 0.99 (0.79-1.26)        | 86                  | 1.13 (0.86-1.47)        | 46            | 0.92 (0.65-1.29)        |
| 5+                                | 6.9                        | 3186         | 135   | 0.91 (0.71-1.16)        | 113          | 1.03 (0.80-1.33)        | 64                    | 0.98 (0.72-1.33)        | 43                  | 1.03 (0.72-1.48)        | 17            | 0.62 (0.37-1.04)        |
| P-trend                           |                            |              |       | 0.431                   |              | 0.816                   |                       | 0.890                   |                     | 0.809                   |               | 0.070                   |
| Continuous, per 5 g/day increment |                            |              |       | 0.95 (0.85-1.06)        |              | 1.00 (0.89-1.12)        |                       | 0.98 (0.84-1.15)        |                     | 1.03 (0.88-1.20)        |               | 0.78 (0.60-1.02)        |

<sup>a</sup> Median intake in the subcohort

**Supplementary Table 3.** Multivariable-adjusted HRs and 95%CI for colon cancer according to total nut intake in strata of potential effect modifiers in men and women; NLCS, 1986-2006

|                                            | Men                           |                  |                  | P-trend | P-interaction | Women                         |                  |                  | P-trend | P-interaction |
|--------------------------------------------|-------------------------------|------------------|------------------|---------|---------------|-------------------------------|------------------|------------------|---------|---------------|
|                                            | Total nut consumption (g/day) |                  |                  |         |               | Total nut consumption (g/day) |                  |                  |         |               |
|                                            | 0 g/day                       | 0.1-<5 g/day     | 5+ g/day         |         |               | 0 g/day                       | 0.1-<5 g/day     | 5+ g/day         |         |               |
| <i>Overall</i>                             |                               |                  |                  |         |               |                               |                  |                  |         |               |
| Cases/person-years                         | 394/8572                      | 425/9484         | 473/10813        |         |               | 445/12925                     | 457/12047        | 270/7900         |         |               |
| HR (95%CI) <sup>a</sup>                    | 1 (reference)                 | 0.99 (0.81-1.20) | 0.97 (0.80-1.18) | 0.777   |               | 1 (reference)                 | 1.18 (0.99-1.41) | 1.10 (0.89-1.37) | 0.645   |               |
| <i>Body mass index</i>                     |                               |                  |                  |         |               |                               |                  |                  |         |               |
| 18.5-<25 kg/m <sup>2</sup>                 |                               |                  |                  |         |               |                               |                  |                  |         |               |
| Cases/person-years                         | 181/4356                      | 214/5391         | 237/5835         |         |               | 218/6697                      | 248/6426         | 171/5163         |         |               |
| HR (95%CI) <sup>a</sup>                    | 1 (reference)                 | 0.93 (0.70-1.23) | 0.98 (0.75-1.30) | 0.899   | 0.836         | 1 (reference)                 | 1.29 (1.00-1.65) | 1.15 (0.86-1.53) | 0.653   | 0.626         |
| 25+ kg/m <sup>2</sup>                      |                               |                  |                  |         |               |                               |                  |                  |         |               |
| Cases/person-years                         | 213/4216                      | 211/4093         | 236/4978         |         |               | 227/6229                      | 209/5621         | 99/2737          |         |               |
| HR (95%CI) <sup>a</sup>                    | 1 (reference)                 | 1.04 (0.79-1.38) | 0.93 (0.70-1.24) | 0.504   |               | 1 (reference)                 | 1.09 (0.83-1.42) | 1.06 (0.75-1.49) | 0.822   |               |
| <i>Nonoccupational physical activity</i>   |                               |                  |                  |         |               |                               |                  |                  |         |               |
| ≤30 min/day                                |                               |                  |                  |         |               |                               |                  |                  |         |               |
| Cases/person-years                         | 74/1272                       | 54/1541          | 65/1790          |         |               | 124/3415                      | 124/2470         | 72/1354          |         |               |
| HR (95%CI) <sup>a</sup>                    | 1 (reference)                 | 0.61 (0.36-1.04) | 0.68 (0.40-1.14) | 0.372   | 0.074         | 1 (reference)                 | 1.39 (0.97-1.99) | 1.43 (0.93-2.21) | 0.165   | 0.487         |
| >30-≤60 min/day                            |                               |                  |                  |         |               |                               |                  |                  |         |               |
| Cases/person-years                         | 113/3097                      | 132/2798         | 167/3404         |         |               | 132/4008                      | 134/3786         | 91/2730          |         |               |
| HR (95%CI) <sup>a</sup>                    | 1 (reference)                 | 1.35 (0.96-1.92) | 1.49 (1.06-2.09) | 0.050   |               | 1 (reference)                 | 1.22 (0.88-1.71) | 1.20 (0.80-1.80) | 0.487   |               |
| >60-≤90 min/day                            |                               |                  |                  |         |               |                               |                  |                  |         |               |
| Cases/person-years                         | 77/1480                       | 95/1924          | 100/2345         |         |               | 108/2861                      | 106/3011         | 64/1904          |         |               |
| HR (95%CI) <sup>a</sup>                    | 1 (reference)                 | 1.05 (0.65-1.69) | 0.77 (0.48-1.24) | 0.173   |               | 1 (reference)                 | 0.97 (0.66-1.41) | 0.93 (0.59-1.47) | 0.782   |               |
| >90 min/day                                |                               |                  |                  |         |               |                               |                  |                  |         |               |
| Cases/person-years                         | 130/2723                      | 144/3221         | 141/3274         |         |               | 81/2642                       | 93/2780          | 43/1911          |         |               |
| HR (95%CI) <sup>a</sup>                    | 1 (reference)                 | 0.83 (0.57-1.19) | 0.77 (0.52-1.12) | 0.262   |               | 1 (reference)                 | 1.05 (0.70-1.60) | 0.75 (0.44-1.28) | 0.198   |               |
| <i>Cigarette smoking status</i>            |                               |                  |                  |         |               |                               |                  |                  |         |               |
| Never                                      |                               |                  |                  |         |               |                               |                  |                  |         |               |
| Cases/person-years                         | 59/1251                       | 54/1570          | 57/1440          |         |               | 286/8206                      | 267/7393         | 145/4174         |         |               |
| HR (95%CI) <sup>a</sup>                    | 1 (reference)                 | 0.91 (0.50-1.65) | 0.95 (0.49-1.83) | 0.962   | 0.671         | 1 (reference)                 | 1.07 (0.85-1.34) | 1.09 (0.82-1.45) | 0.601   | 0.015         |
| Former                                     |                               |                  |                  |         |               |                               |                  |                  |         |               |
| Cases/person-years                         | 226/4339                      | 256/5132         | 307/6097         |         |               | 81/1925                       | 118/2668         | 56/2194          |         |               |
| HR (95%CI) <sup>a</sup>                    | 1 (reference)                 | 1.00 (0.76-1.30) | 1.00 (0.78-1.30) | 0.955   |               | 1 (reference)                 | 1.40 (0.89-2.22) | 0.79 (0.48-1.32) | 0.075   |               |
| Current                                    |                               |                  |                  |         |               |                               |                  |                  |         |               |
| Cases/person-years                         | 109/2981                      | 115/2782         | 109/3276         |         |               | 78/2794                       | 72/1986          | 69/1532          |         |               |
| HR (95%CI) <sup>a</sup>                    | 1 (reference)                 | 1.08 (0.75-1.54) | 0.91 (0.62-1.34) | 0.490   |               | 1 (reference)                 | 1.28 (0.82-1.99) | 1.73 (1.05-2.86) | 0.041   |               |
| <i>Alcohol consumption</i>                 |                               |                  |                  |         |               |                               |                  |                  |         |               |
| 0 g/day                                    |                               |                  |                  |         |               |                               |                  |                  |         |               |
| Cases/person-years                         | 76/2121                       | 47/1188          | 36/751           |         |               | 179/5416                      | 133/3355         | 50/1441          |         |               |
| HR (95%CI) <sup>a</sup>                    | 1 (reference)                 | 1.04 (0.61-1.75) | 1.37 (0.76-2.47) | 0.287   | 0.643         | 1 (reference)                 | 1.22 (0.89-1.66) | 1.04 (0.67-1.62) | 0.883   | 0.870         |
| 0.1-<15 g/day                              |                               |                  |                  |         |               |                               |                  |                  |         |               |
| Cases/person-years                         | 180/3683                      | 223/5229         | 216/4906         |         |               | 216/6051                      | 267/7212         | 169/5121         |         |               |
| HR (95%CI) <sup>a</sup>                    | 1 (reference)                 | 0.89 (0.67-1.18) | 0.94 (0.70-1.25) | 0.884   |               | 1 (reference)                 | 1.14 (0.89-1.45) | 1.03 (0.77-1.37) | 0.883   |               |
| ≥15 g/day                                  |                               |                  |                  |         |               |                               |                  |                  |         |               |
| Cases/person-years                         | 138/2768                      | 155/3067         | 221/5156         |         |               | 50/1458                       | 57/1479          | 51/1338          |         |               |
| HR (95%CI) <sup>a</sup>                    | 1 (reference)                 | 0.98 (0.70-1.37) | 0.88 (0.64-1.19) | 0.348   |               | 1 (reference)                 | 1.50 (0.81-2.78) | 1.74 (0.89-3.40) | 0.164   |               |
| <i>Educational level</i>                   |                               |                  |                  |         |               |                               |                  |                  |         |               |
| Low                                        |                               |                  |                  |         |               |                               |                  |                  |         |               |
| Cases/person-years                         | 180/4237                      | 152/4237         | 168/3670         |         |               | 264/8063                      | 242/6252         | 121/3601         |         |               |
| HR (95%CI) <sup>a</sup>                    | 1 (reference)                 | 0.88 (0.66-1.18) | 1.12 (0.82-1.52) | 0.278   | 0.157         | 1 (reference)                 | 1.23 (0.97-1.56) | 1.08 (0.79-1.47) | 0.819   | 0.317         |
| Medium                                     |                               |                  |                  |         |               |                               |                  |                  |         |               |
| Cases/person-years                         | 147/2840                      | 160/3378         | 172/4339         |         |               | 146/4099                      | 178/4479         | 113/3256         |         |               |
| HR (95%CI) <sup>a</sup>                    | 1 (reference)                 | 0.93 (0.66-1.30) | 0.80 (0.57-1.11) | 0.161   |               | 1 (reference)                 | 1.29 (0.94-1.76) | 1.13 (0.78-1.64) | 0.832   |               |
| High                                       |                               |                  |                  |         |               |                               |                  |                  |         |               |
| Cases/person-years                         | 67/1495                       | 113/1869         | 133/2805         |         |               | 35/764                        | 37/1316          | 36/1043          |         |               |
| HR (95%CI) <sup>a</sup>                    | 1 (reference)                 | 1.21 (0.75-1.95) | 1.11 (0.71-1.75) | 0.922   |               | 1 (reference)                 | 0.69 (0.35-1.39) | 0.90 (0.43-1.90) | 0.867   |               |
| <i>Family history of colorectal cancer</i> |                               |                  |                  |         |               |                               |                  |                  |         |               |
| No                                         |                               |                  |                  |         |               |                               |                  |                  |         |               |
| Cases/person-years                         | 358/8052                      | 380/9015         | 431/10160        |         |               | 393/12202                     | 408/11287        | 247/7431         |         |               |
| HR (95%CI) <sup>a</sup>                    | 1 (reference)                 | 0.94 (0.77-1.16) | 0.97 (0.79-1.18) | 0.894   | 0.367         | 1 (reference)                 | 1.20 (0.99-1.44) | 1.15 (0.92-1.44) | 0.398   | 0.368         |
| Yes                                        |                               |                  |                  |         |               |                               |                  |                  |         |               |
| Cases/person-years                         | 36/520                        | 45/468           | 42/653           |         |               | 52/723                        | 49/760           | 23/469           |         |               |
| HR (95%CI) <sup>a</sup>                    | 1 (reference)                 | 0.99 (0.38-2.57) | 0.63 (0.23-1.76) | 0.323   |               | 1 (reference)                 | 0.92 (0.40-2.08) | 0.87 (0.32-2.36) | 0.804   |               |

<sup>a</sup> Adjusted for age (years; continuous), cigarette smoking (status (never/former/current), frequency (n/day; continuous, centered), and duration (years; continuous, centered)), BMI (18.5-<25/25+ kg/m<sup>2</sup>), nonoccupational physical activity (≤30/>30-≤60/>60-≤90/>90 min/day), educational level (low/medium/high), family history of colorectal cancer (no/yes), total energy intake (kcal/day; continuous), and alcohol consumption (0/0.1-<5/5-<15/15-<30/30+ g/day)

**Supplementary Table 4.** Multivariable-adjusted HRs and 95%CI for rectal cancer according to total nut intake in strata of potential effect modifiers in men and women; NLCS, 1986-2006

|                                            | Men                           |                  |                  | P-trend | P-interaction | Women                         |                  |                  | P-trend | P-interaction |
|--------------------------------------------|-------------------------------|------------------|------------------|---------|---------------|-------------------------------|------------------|------------------|---------|---------------|
|                                            | Total nut consumption (g/day) |                  |                  |         |               | Total nut consumption (g/day) |                  |                  |         |               |
|                                            | 0 g/day                       | 0.1-<5 g/day     | 5+ g/day         |         |               | 0 g/day                       | 0.1-<5 g/day     | 5+ g/day         |         |               |
| <i>Overall</i>                             |                               |                  |                  |         |               |                               |                  |                  |         |               |
| Cases/person-years                         | 155/8572                      | 167/9484         | 152/10813        |         |               | 126/12925                     | 105/12047        | 44/7900          |         |               |
| HR (95%CI) <sup>a</sup>                    | 1 (reference)                 | 1.01 (0.78-1.31) | 0.78 (0.60-1.03) | 0.043   |               | 1 (reference)                 | 0.94 (0.70-1.27) | 0.58 (0.39-0.87) | 0.005   |               |
| <i>Body mass index</i>                     |                               |                  |                  |         |               |                               |                  |                  |         |               |
| 18.5-<25 kg/m <sup>2</sup>                 |                               |                  |                  |         |               |                               |                  |                  |         |               |
| Cases/person-years                         | 86/4356                       | 68/5391          | 82/5835          |         |               | 66/6697                       | 61/6426          | 27/5163          |         |               |
| HR (95%CI) <sup>a</sup>                    | 1 (reference)                 | 0.63 (0.44-0.92) | 0.70 (0.48-1.01) | 0.250   | 0.002         | 1 (reference)                 | 1.07 (0.72-1.60) | 0.57 (0.34-0.96) | 0.006   | 0.639         |
| 25+ kg/m <sup>2</sup>                      |                               |                  |                  |         |               |                               |                  |                  |         |               |
| Cases/person-years                         | 69/4216                       | 99/4093          | 70/4978          |         |               | 60/6229                       | 44/5621          | 17/2737          |         |               |
| HR (95%CI) <sup>a</sup>                    | 1 (reference)                 | 1.52 (1.04-2.21) | 0.85 (0.56-1.30) | 0.079   |               | 1 (reference)                 | 0.83 (0.53-1.30) | 0.63 (0.34-1.15) | 0.145   |               |
| <i>Nonoccupational physical activity</i>   |                               |                  |                  |         |               |                               |                  |                  |         |               |
| ≤30 min/day                                |                               |                  |                  |         |               |                               |                  |                  |         |               |
| Cases/person-years                         | 23/1272                       | 20/1541          | 24/1790          |         |               | 40/3415                       | 29/2470          | 6/1354           |         |               |
| HR (95%CI) <sup>a</sup>                    | 1 (reference)                 | 0.82 (0.38-1.76) | 0.94 (0.44-1.98) | 0.971   | 0.702         | 1 (reference)                 | 1.06 (0.60-1.88) | 0.33 (0.13-0.85) | 0.015   | 0.431         |
| >30-≤60 min/day                            |                               |                  |                  |         |               |                               |                  |                  |         |               |
| Cases/person-years                         | 49/3097                       | 47/2798          | 50/3404          |         |               | 44/4008                       | 29/3786          | 12/2730          |         |               |
| HR (95%CI) <sup>a</sup>                    | 1 (reference)                 | 1.15 (0.71-1.85) | 1.12 (0.69-1.80) | 0.751   |               | 1 (reference)                 | 0.77 (0.45-1.32) | 0.45 (0.21-0.94) | 0.040   |               |
| >60-≤90 min/day                            |                               |                  |                  |         |               |                               |                  |                  |         |               |
| Cases/person-years                         | 26/1480                       | 41/1924          | 32/2345          |         |               | 22/2861                       | 27/3011          | 17/1904          |         |               |
| HR (95%CI) <sup>a</sup>                    | 1 (reference)                 | 1.58 (0.84-2.98) | 0.77 (0.39-1.50) | 0.122   |               | 1 (reference)                 | 1.17 (0.59-2.32) | 1.27 (0.58-2.72) | 0.603   |               |
| >90 min/day                                |                               |                  |                  |         |               |                               |                  |                  |         |               |
| Cases/person-years                         | 57/2723                       | 59/3221          | 46/3274          |         |               | 20/2642                       | 20/2780          | 9/1911           |         |               |
| HR (95%CI) <sup>a</sup>                    | 1 (reference)                 | 0.74 (0.46-1.19) | 0.54 (0.33-0.89) | 0.025   |               | 1 (reference)                 | 0.83 (0.39-1.76) | 0.49 (0.19-1.27) | 0.143   |               |
| <i>Cigarette smoking status</i>            |                               |                  |                  |         |               |                               |                  |                  |         |               |
| Never                                      |                               |                  |                  |         |               |                               |                  |                  |         |               |
| Cases/person-years                         | 22/1251                       | 20/1570          | 14/1440          |         |               | 65/8206                       | 61/7393          | 24/4174          |         |               |
| HR (95%CI) <sup>a</sup>                    | 1 (reference)                 | 0.74 (0.32-1.70) | 0.54 (0.21-1.41) | 0.242   | 0.582         | 1 (reference)                 | 1.08 (0.74-1.57) | 0.76 (0.45-1.28) | 0.247   | 0.521         |
| Former                                     |                               |                  |                  |         |               |                               |                  |                  |         |               |
| Cases/person-years                         | 76/4339                       | 95/5132          | 99/6097          |         |               | 27/1925                       | 21/2668          | 12/2194          |         |               |
| HR (95%CI) <sup>a</sup>                    | 1 (reference)                 | 1.05 (0.73-1.51) | 0.88 (0.61-1.26) | 0.339   |               | 1 (reference)                 | 0.60 (0.26-1.37) | 0.37 (0.15-0.94) | 0.053   |               |
| Current                                    |                               |                  |                  |         |               |                               |                  |                  |         |               |
| Cases/person-years                         | 57/2981                       | 52/2782          | 39/3276          |         |               | 34/2794                       | 23/1986          | 8/1532           |         |               |
| HR (95%CI) <sup>a</sup>                    | 1 (reference)                 | 1.03 (0.65-1.63) | 0.68 (0.40-1.15) | 0.096   |               | 1 (reference)                 | 1.02 (0.55-1.91) | 0.43 (0.18-1.04) | 0.050   |               |
| <i>Alcohol consumption</i>                 |                               |                  |                  |         |               |                               |                  |                  |         |               |
| 0 g/day                                    |                               |                  |                  |         |               |                               |                  |                  |         |               |
| Cases/person-years                         | 28/2121                       | 14/1188          | 13/751           |         |               | 51/5416                       | 26/3355          | 9/1441           |         |               |
| HR (95%CI) <sup>a</sup>                    | 1 (reference)                 | 1.02 (0.45-2.29) | 1.67 (0.72-3.89) | 0.214   | 0.441         | 1 (reference)                 | 0.83 (0.50-1.40) | 0.60 (0.27-1.29) | 0.191   | 0.872         |
| 0.1-<15 g/day                              |                               |                  |                  |         |               |                               |                  |                  |         |               |
| Cases/person-years                         | 66/3683                       | 85/5229          | 62/4906          |         |               | 59/6051                       | 65/7212          | 25/5121          |         |               |
| HR (95%CI) <sup>a</sup>                    | 1 (reference)                 | 0.94 (0.64-1.38) | 0.74 (0.50-1.11) | 0.125   |               | 1 (reference)                 | 0.92 (0.61-1.39) | 0.49 (0.29-0.84) | 0.006   |               |
| ≥15 g/day                                  |                               |                  |                  |         |               |                               |                  |                  |         |               |
| Cases/person-years                         | 61/2768                       | 68/3067          | 77/5156          |         |               | 16/1458                       | 14/1479          | 10/1338          |         |               |
| HR (95%CI) <sup>a</sup>                    | 1 (reference)                 | 1.05 (0.69-1.60) | 0.71 (0.47-1.07) | 0.043   |               | 1 (reference)                 | 1.06 (0.40-2.80) | 1.28 (0.47-3.53) | 0.608   |               |
| <i>Educational level</i>                   |                               |                  |                  |         |               |                               |                  |                  |         |               |
| Low                                        |                               |                  |                  |         |               |                               |                  |                  |         |               |
| Cases/person-years                         | 94/4237                       | 82/4237          | 65/3670          |         |               | 71/8063                       | 54/6252          | 24/3601          |         |               |
| HR (95%CI) <sup>a</sup>                    | 1 (reference)                 | 0.89 (0.61-1.28) | 0.75 (0.50-1.12) | 0.175   | 0.404         | 1 (reference)                 | 1.02 (0.69-1.51) | 0.74 (0.44-1.25) | 0.229   | 0.583         |
| Medium                                     |                               |                  |                  |         |               |                               |                  |                  |         |               |
| Cases/person-years                         | 47/2840                       | 52/3378          | 57/4339          |         |               | 49/4099                       | 40/4479          | 17/3256          |         |               |
| HR (95%CI) <sup>a</sup>                    | 1 (reference)                 | 0.95 (0.59-1.54) | 0.83 (0.51-1.34) | 0.421   |               | 1 (reference)                 | 0.82 (0.49-1.38) | 0.49 (0.25-0.96) | 0.039   |               |
| High                                       |                               |                  |                  |         |               |                               |                  |                  |         |               |
| Cases/person-years                         | 14/1495                       | 33/1869          | 30/2805          |         |               | 6/764                         | 11/1316          | 3/1043           |         |               |
| HR (95%CI) <sup>a</sup>                    | 1 (reference)                 | 1.70 (0.81-3.59) | 1.04 (0.48-2.28) | 0.427   |               | 1 (reference)                 | 0.99 (0.23-4.17) | 0.27 (0.04-1.71) | 0.102   |               |
| <i>Family history of colorectal cancer</i> |                               |                  |                  |         |               |                               |                  |                  |         |               |
| No                                         |                               |                  |                  |         |               |                               |                  |                  |         |               |
| Cases/person-years                         | 146/8052                      | 153/9015         | 143/10160        |         |               | 113/12202                     | 98/11287         | 37/7431          |         |               |
| HR (95%CI) <sup>a</sup>                    | 1 (reference)                 | 0.97 (0.74-1.27) | 0.78 (0.59-1.03) | 0.059   | 0.354         | 1 (reference)                 | 1.01 (0.74-1.37) | 0.57 (0.37-0.87) | 0.005   | 0.270         |
| Yes                                        |                               |                  |                  |         |               |                               |                  |                  |         |               |
| Cases/person-years                         | 9/520                         | 14/468           | 9/653            |         |               | 13/723                        | 7/760            | 7/469            |         |               |
| HR (95%CI) <sup>a</sup>                    | 1 (reference)                 | 1.47 (0.23-9.54) | 0.43 (0.05-3.66) | 0.270   |               | 1 (reference)                 | 0.20 (0.03-1.23) | 0.71 (0.17-3.06) | 0.913   |               |

<sup>a</sup> Adjusted for age (years; continuous), cigarette smoking (status (never/former/current), frequency (n/day; continuous, centered), and duration (years; continuous, centered)), BMI (18.5-<25/25+ kg/m<sup>2</sup>), nonoccupational physical activity (≤30/>30-≤60/>60-≤90/>90 min/day), educational level (low/medium/high), family history of colorectal cancer (no/yes), total energy intake (kcal/day; continuous), and alcohol consumption (0/0.1-<5/5-<15/15-<30/30+ g/day)

**Supplementary Table 5.** Median nut and peanut butter intake of colon and rectal cancer cases diagnosed over the follow-up period; NLCS, 1986-2006

| Time between inclusion (September 1986) and colorectal cancer diagnosis (years) | Colon cancer |                             |       |                             | Rectal cancer |                             |       |                             |
|---------------------------------------------------------------------------------|--------------|-----------------------------|-------|-----------------------------|---------------|-----------------------------|-------|-----------------------------|
|                                                                                 | Men          |                             | Women |                             | Men           |                             | Women |                             |
|                                                                                 | n            | Median intake (g/day) (IQR) | n     | Median intake (g/day) (IQR) | n             | Median intake (g/day) (IQR) | n     | Median intake (g/day) (IQR) |
| <b>Total nut consumption</b>                                                    |              |                             |       |                             |               |                             |       |                             |
| 0-<2                                                                            | 72           | 3.6 (0.0-10.7)              | 61    | 2.0 (0.0-5.8)               | 33            | 2.5 (0.0-5.8)               | 23    | 0.0 (0.0-1.0)               |
| 2-<4                                                                            | 71           | 4.3 (0.0-9.0)               | 82    | 1.0 (0.0-4.3)               | 46            | 2.3 (0.0-8.5)               | 23    | 0.9 (0.0-2.5)               |
| 4-<6                                                                            | 105          | 2.5 (0.0-7.8)               | 87    | 1.0 (0.0-4.3)               | 43            | 2.0 (0.0-7.0)               | 23    | 2.0 (0.0-4.9)               |
| 6-<8                                                                            | 129          | 2.0 (0.0-7.4)               | 120   | 1.0 (0.0-4.5)               | 45            | 0.0 (0.0-3.6)               | 26    | 1.0 (0.0-4.5)               |
| 8-<10                                                                           | 137          | 3.0 (0.5-8.5)               | 118   | 1.0 (0.0-4.3)               | 46            | 4.3 (1.0-13.2)              | 20    | 1.2 (0.0-3.2)               |
| 10-<12                                                                          | 167          | 2.5 (0.0-10.7)              | 102   | 1.4 (0.0-4.9)               | 56            | 2.3 (0.0-17.2)              | 29    | 0.8 (0.0-2.5)               |
| 12-<14                                                                          | 145          | 2.6 (0.0-8.5)               | 130   | 1.8 (0.0-4.3)               | 62            | 2.0 (0.0-4.9)               | 30    | 0.4 (0.0-2.5)               |
| 14-<16                                                                          | 146          | 3.9 (0.0-10.7)              | 147   | 1.8 (0.0-5.1)               | 48            | 3.3 (1.0-9.5)               | 37    | 1.3 (0.0-4.3)               |
| 16-<18                                                                          | 163          | 4.5 (0.0-12.8)              | 144   | 2.0 (0.0-6.2)               | 52            | 4.2 (0.0-10.7)              | 25    | 2.1 (0.0-3.6)               |
| 18+                                                                             | 161          | 3.3 (0.0-9.0)               | 196   | 1.8 (0.0-4.9)               | 44            | 3.6 (0.0-11.7)              | 41    | 1.0 (0.0-2.5)               |
| p <sup>a</sup>                                                                  |              | 0.072                       |       | 0.459                       |               | 0.013                       |       | 0.380                       |

<sup>a</sup> P-values based on Kruskal-Wallis tests

**Supplementary Table 6.** Baseline characteristics of subcohort members and cases per molecular subtype of colorectal cancer; NLCS, 1986-1993, excluding the first 2.3 years of follow-up

|                                               | Subcohort   | No truncating mutation in APC | Truncating mutation in APC | No activating mutation in KRAS | Activating mutation in KRAS | No p53 over-expression | p53 over-expression | No BRAF mutation | BRAF mutation | MSS         | MSI          |
|-----------------------------------------------|-------------|-------------------------------|----------------------------|--------------------------------|-----------------------------|------------------------|---------------------|------------------|---------------|-------------|--------------|
| <b>Men</b>                                    |             |                               |                            |                                |                             |                        |                     |                  |               |             |              |
| N                                             | 1773        | 202                           | 110                        | 210                            | 102                         | 128                    | 180                 | 251              | 44            | 243         | 30           |
| Age (years)                                   | 61.1 (4.2)  | 63.0 (4.3)                    | 62.5 (3.9)                 | 62.6 (4.2)                     | 63.2 (4.2)                  | 63.2 (4.1)             | 62.6 (4.2)          | 62.9 (4.2)       | 62.1 (4.3)    | 62.8 (4.1)  | 63.6 (4.5)   |
| Body Mass Index (kg/m <sup>2</sup> )          | 24.9 (2.6)  | 25.3 (2.7)                    | 25.4 (3.0)                 | 25.2 (2.8)                     | 25.6 (2.9)                  | 25.5 (3.1)             | 25.2 (2.6)          | 25.4 (2.9)       | 25.1 (2.4)    | 25.4 (2.9)  | 24.9 (2.2)   |
| Ever cigarette smoker (%)                     | 86.2        | 89.1                          | 88.2                       | 89.0                           | 88.2                        | 88.3                   | 88.9                | 88.8             | 84.1          | 87.7        | 90.0         |
| University or higher vocational education (%) | 20.3        | 20.3                          | 23.6                       | 24.3                           | 15.7                        | 20.3                   | 21.7                | 20.3             | 34.1          | 22.6        | 26.7         |
| Non-occupational physical activity (min/day)  | 80.9 (67.2) | 86.6 (70.5)                   | 84.2 (82.4)                | 94.3 (84.5)                    | 68.1 (44.6)                 | 89.7 (88.7)            | 81.9 (59.2)         | 82.2 (70.7)      | 99.1 (89.4)   | 81.5 (72.2) | 106.1 (96.8) |
| Family history of colorectal cancer (%)       | 5.6         | 12.9                          | 12.7                       | 12.9                           | 12.8                        | 14.8                   | 11.7                | 13.9             | 9.1           | 14.4        | 10.0         |
| Daily energy intake (kcal)                    | 2169 (498)  | 2131 (418)                    | 2134 (499)                 | 2131 (464)                     | 2136 (415)                  | 2163 (458)             | 2107 (438)          | 2128 (460)       | 2151 (352)    | 2135 (455)  | 2151 (412)   |
| Total nut intake (g/day)                      | 8.0 (13.7)  | 7.5 (14.8)                    | 6.1 (11.3)                 | 6.3 (11.7)                     | 8.5 (17.0)                  | 6.2 (10.9)             | 7.6 (15.5)          | 7.1 (14.3)       | 6.1 (8.6)     | 7.1 (13.7)  | 6.5 (14.0)   |
| Tree nut intake (g/day)                       | 1.0 (3.4)   | 0.9 (3.1)                     | 0.8 (3.6)                  | 0.9 (3.3)                      | 0.8 (3.2)                   | 0.8 (3.0)              | 0.9 (3.5)           | 0.9 (3.5)        | 1.0 (2.8)     | 0.8 (2.9)   | 1.9 (6.6)    |
| Peanut intake (g/day)                         | 7.0 (12.9)  | 6.6 (14.1)                    | 5.3 (10.6)                 | 5.4 (10.7)                     | 7.7 (16.7)                  | 5.4 (10.2)             | 6.7 (14.7)          | 6.2 (13.5)       | 5.2 (8.0)     | 6.3 (13.1)  | 4.6 (11.0)   |
| Peanut butter intake (g/day)                  | 1.4 (4.2)   | 1.7 (4.3)                     | 1.9 (5.0)                  | 1.8 (4.5)                      | 1.6 (4.7)                   | 1.3 (3.6)              | 2.1 (5.2)           | 2.0 (5.0)        | 0.9 (2.4)     | 1.8 (4.9)   | 1.3 (2.7)    |
| Alcohol intake (g/day)                        | 15.0 (16.9) | 15.3 (15.6)                   | 17.1 (18.4)                | 16.0 (17.2)                    | 15.9 (15.4)                 | 14.8 (13.2)            | 16.7 (18.6)         | 16.5 (17.2)      | 14.0 (14.7)   | 16.9 (17.3) | 11.9 (13.4)  |
| <b>Women</b>                                  |             |                               |                            |                                |                             |                        |                     |                  |               |             |              |
| N                                             | 1859        | 180                           | 82                         | 176                            | 86                          | 116                    | 144                 | 201              | 50            | 204         | 38           |
| Age (years)                                   | 61.4 (4.2)  | 62.9 (3.9)                    | 62.5 (4.0)                 | 62.6 (4.0)                     | 63.1 (3.8)                  | 63.1 (3.9)             | 62.6 (4.0)          | 62.8 (3.9)       | 62.8 (4.0)    | 62.7 (3.9)  | 63.6 (4.3)   |
| Body Mass Index (kg/m <sup>2</sup> )          | 25.0 (3.5)  | 25.1 (3.4)                    | 26.0 (3.7)                 | 25.4 (3.4)                     | 25.5 (3.7)                  | 25.4 (3.5)             | 25.4 (3.5)          | 25.5 (3.6)       | 25.4 (3.5)    | 25.4 (3.5)  | 25.9 (4.2)   |
| Ever cigarette smoker (%)                     | 40.9        | 39.5                          | 36.6                       | 40.3                           | 34.9                        | 43.1                   | 34.0                | 37.8             | 46.0          | 36.8        | 44.7         |
| University or higher vocational education (%) | 9.5         | 6.7                           | 14.6                       | 8.0                            | 11.6                        | 7.8                    | 9.7                 | 10.5             | 4.0           | 10.3        | 5.3          |
| Non-occupational physical activity (min/day)  | 65.6 (50.8) | 61.9 (46.3)                   | 57.6 (41.8)                | 61.5 (43.5)                    | 58.8 (47.9)                 | 59.2 (40.9)            | 61.5 (48.2)         | 59.0 (43.4)      | 68.5 (52.2)   | 59.3 (43.7) | 64.5 (55.7)  |
| Family history of colorectal cancer (%)       | 6.1         | 10.0                          | 9.8                        | 11.4                           | 7.0                         | 12.9                   | 7.6                 | 10.0             | 10.0          | 11.3        | 7.9          |
| Daily energy intake (kcal)                    | 1685 (390)  | 1633 (358)                    | 1728 (419)                 | 1639 (374)                     | 1710 (390)                  | 1696 (405)             | 1639 (359)          | 1671 (397)       | 1620 (309)    | 1663 (387)  | 1638 (362)   |
| Total nut intake (g/day)                      | 4.4 (8.5)   | 3.9 (10.5)                    | 3.4 (7.1)                  | 3.3 (6.4)                      | 4.5 (13.9)                  | 5.2 (13.1)             | 2.6 (4.9)           | 3.9 (10.3)       | 3.7 (6.9)     | 3.8 (10.3)  | 2.8 (4.7)    |
| Tree nut intake (g/day)                       | 1.1 (4.0)   | 0.8 (3.3)                     | 1.0 (3.0)                  | 0.6 (1.9)                      | 1.5 (4.9)                   | 1.4 (4.4)              | 0.5 (1.7)           | 1.0 (3.5)        | 0.8 (2.6)     | 1.0 (3.6)   | 0.4 (0.7)    |
| Peanut intake (g/day)                         | 3.3 (7.0)   | 3.0 (8.0)                     | 2.4 (5.5)                  | 2.7 (5.6)                      | 3.1 (9.9)                   | 3.8 (9.7)              | 2.1 (4.5)           | 2.9 (7.9)        | 2.9 (5.2)     | 2.8 (7.7)   | 2.4 (4.7)    |
| Peanut butter intake (g/day)                  | 1.2 (3.6)   | 1.1 (3.3)                     | 0.4 (1.2)                  | 0.9 (2.9)                      | 0.9 (2.7)                   | 1.2 (3.5)              | 0.7 (2.2)           | 0.8 (2.4)        | 1.0 (4.1)     | 0.9 (3.0)   | 0.7 (1.5)    |
| Alcohol intake (g/day)                        | 5.9 (9.3)   | 6.0 (11.3)                    | 5.4 (10.3)                 | 5.9 (11.5)                     | 5.7 (9.9)                   | 6.3 (10.5)             | 5.4 (11.3)          | 5.5 (11.0)       | 7.8 (11.9)    | 5.2 (9.3)   | 8.9 (18.1)   |

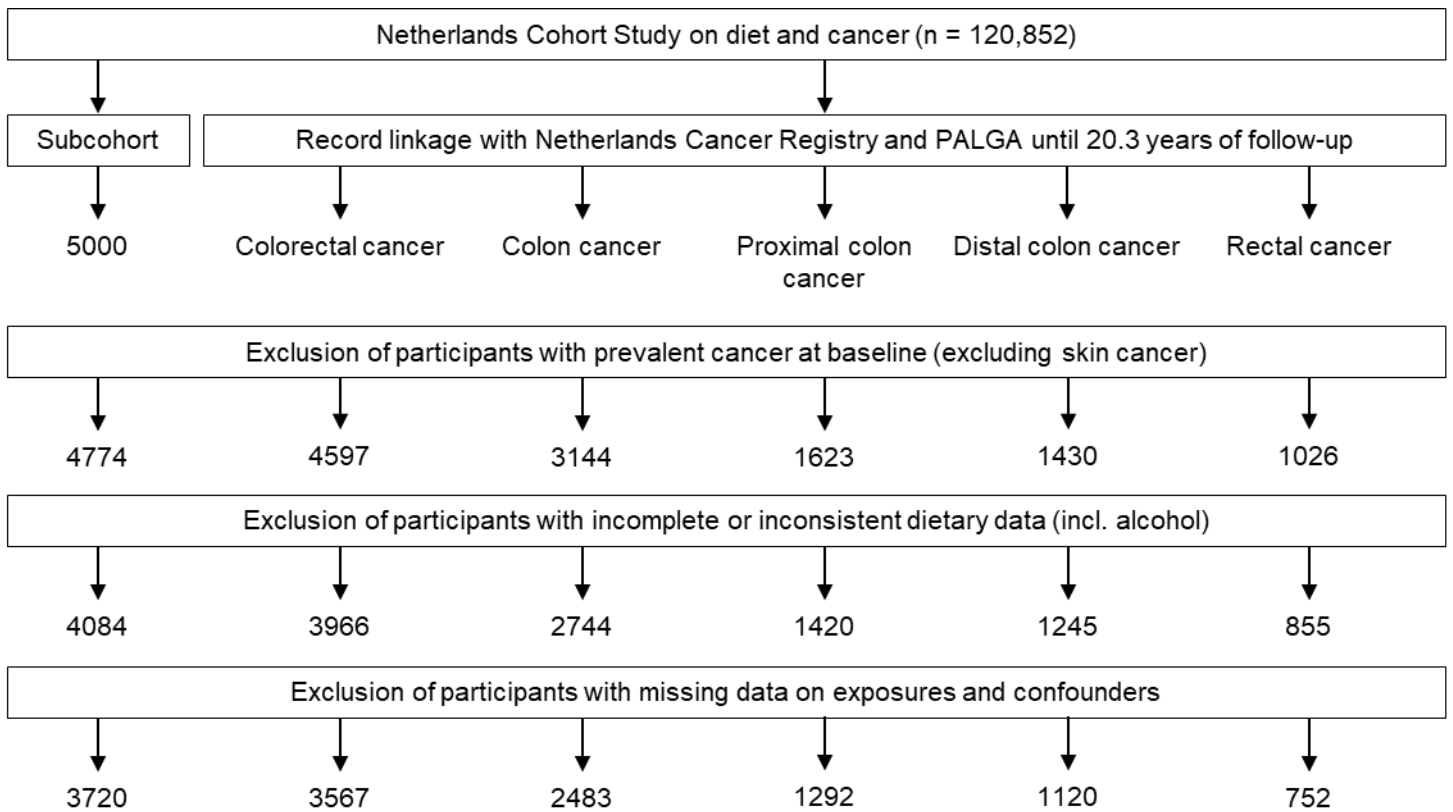

**Supplementary Figure 1.** Flow diagram of the number of colorectal cancer cases and subcohort members; NLCS, 1986-2006



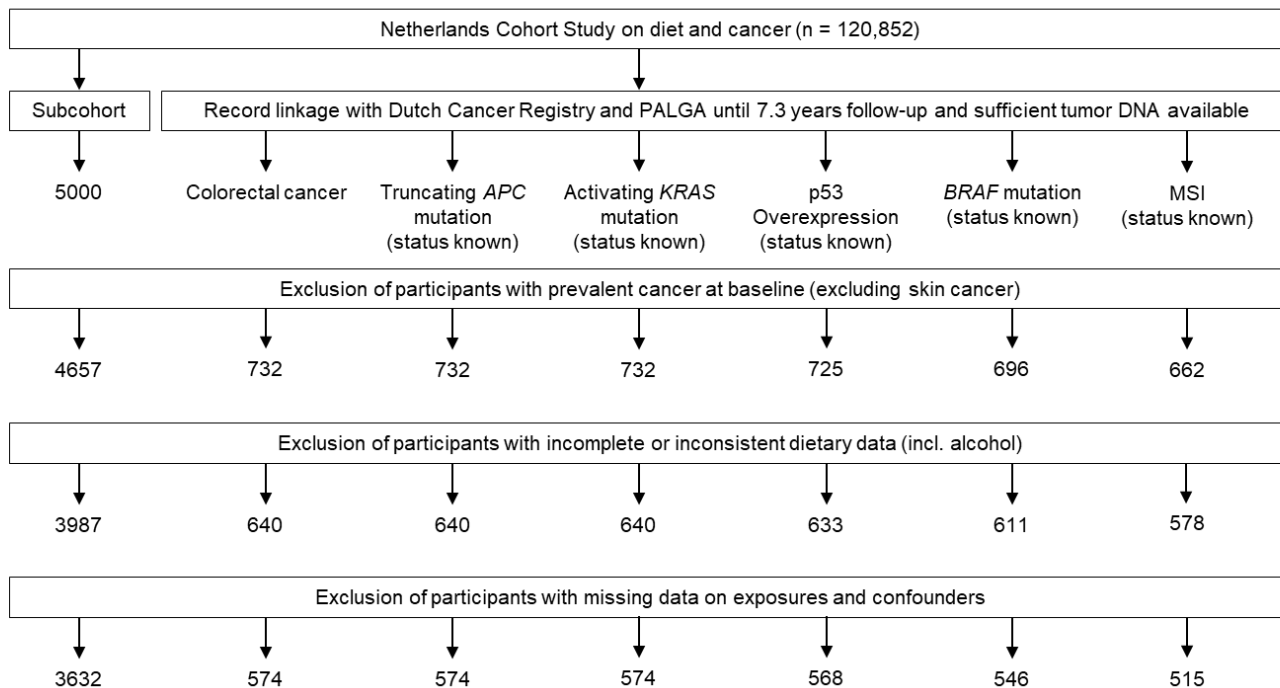

**Supplementary Figure 2.** Flow diagram of the number of colorectal cancer cases per molecular subtype and subcohort members; NLCS, 1986-1993, excluding the first 2.3 years of follow-up
